# Supplementary material for: VO2 thermochromic smart window for energy savings and generation
Source: PubMed Central journal article supplement — Sci Rep. 2013 Oct 24;3:3029. doi: 10.1038/srep03029 (PMC3807258; doi:10.1038/srep03029), 2013-10-24
Supplement: srep03029-s1.pdf [file srep03029-s1.pdf]

## Supplementary Information

# VO<sub>2</sub> thermochromic smart window for energy savings and generation

Jiadong Zhou<sup>1,2</sup>, Yanfeng Gao<sup>1,2\*</sup>, Zongtao Zhang<sup>3</sup>, Hongjie Luo<sup>1,2</sup>, Chuanxiang Cao<sup>2</sup>, Zhang Chen<sup>2</sup>, Lei Dai<sup>2</sup>, Xinling Liu<sup>2</sup>

<sup>1</sup> School of Materials Science and Engineering, Shanghai University, Shangda Rd. 99, Baoshan, Shanghai 200444, China.

<sup>2</sup> Shanghai Institute of Ceramics (SIC), Chinese Academy of Sciences (CAS), Dingxi 1295, Changning, Shanghai, 200050, China.

<sup>3</sup> School of Materials Science and Engineering, Zhengzhou University, Zhengzhou 450001, China.

### Calculations

The total internal reflection occurs when the light propagation into an optically thinner medium from an optically dense medium at the angle of incidence bigger than the total internal reflection angle. The corresponding formula is as follow:

$$\sin c = 1/n$$

in which  $n$  represents the refractive index of the optically dense medium and  $c$  represents the internal reflection angle. In our devices,  $n$  is 1.59, and  $c$  can be calculated to be 38.9°.

To investigate the optical properties of the devices, the transmittances spectra (visible and solar) and the IR modulation abilities of three devices were characterised and further calculated according to the equation

$$T_i = \int \varphi_i T(\lambda) d\lambda / \int \varphi_i(\lambda) d\lambda$$

where  $T_\lambda$  denotes the transmittance at wavelength ( $\lambda$ ),  $i$  denotes vis or sol for the calculations, is the standard luminous efficiency function for the photonic vision and is the solar irradiance spectrum for an air mass 1.5 corresponding to 37 °C above the horizon<sup>1</sup>.

To investigate the properties of the devices, we characterised the solar cell by

measuring the efficiency, open-circuit voltage ( $V_{oc}$ ), fill factor ( $FF$ ) and short-circuit current density ( $J_{sc}$ ) under AM 1.5 illumination.

## Discussion

Figures S1-a and S1-b show the XRD patterns of the  $\text{VO}_2$  film and  $\text{VO}_2$  nanoparticles, respectively. All of the peaks from Figures S1-a and S1-b can be indexed to  $\text{VO}_2$  (M).

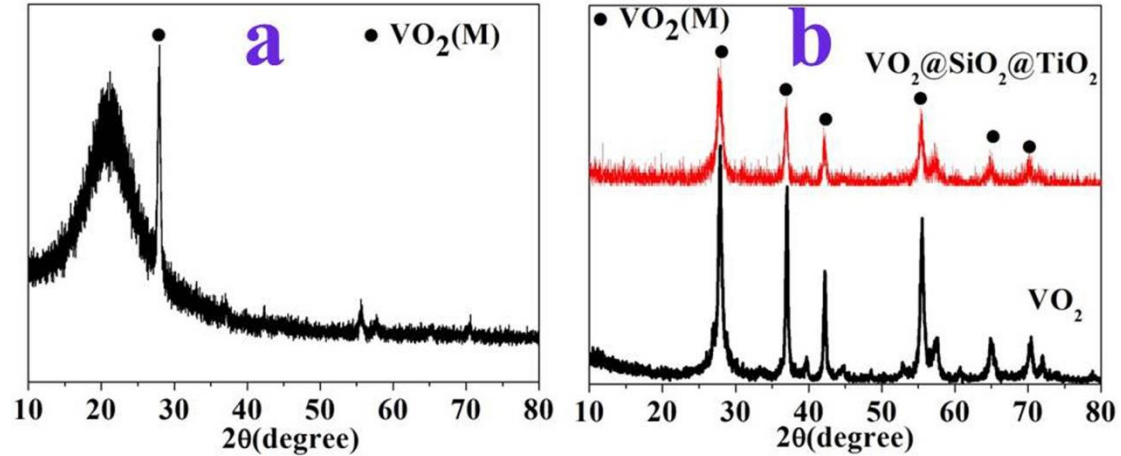

**Figure S1|XRD result of  $\text{VO}_2$  film and  $\text{VO}_2$  nanoparticles.** a, XRD pattern of the  $\text{VO}_2$  film prepared by the solution method. b, XRD patterns of the  $\text{VO}_2$  and  $\text{VO}_2@SiO_2@TiO_2$  nanoparticles.

Figure S2 shows the SEM and TEM images of the  $\text{VO}_2$  film and the  $\text{VO}_2$ ,  $\text{VO}_2@SiO_2$  and  $\text{VO}_2@SiO_2@TiO_2$  nanoparticles. The  $\text{VO}_2$  film is particulate with spherical  $\text{VO}_2$  particles approximately 10 - 200 nm in diameter (Figures 2a, 2b). The SAED pattern in Figure S2c suggests that the film is highly crystalline. Figure S2d shows the morphology of the  $\text{VO}_2$  nanoparticles, which are  $\text{VO}_2$  (M) in crystalline phase and were prepared using the hydrothermal method. Figures S2e and S2f show the morphology of the  $\text{VO}_2@SiO_2$  core-shell structure, and Figure S2i provides the EDS of the selected area of the red circle. The TEM image for the  $\text{VO}_2@SiO_2@TiO_2$  nanoparticles is shown in Figure S2g. The corresponding EDS patterns of the k, j, and m points indicated in Figure S2g show three layers of the particle. The corresponding STEM of the green line in Figure S2g is shown in Figure S2h. From the EDS and the STEM, we can conclude that the three-layered structure of the  $\text{VO}_2@SiO_2@TiO_2$

nanoparticles was successfully synthesised.

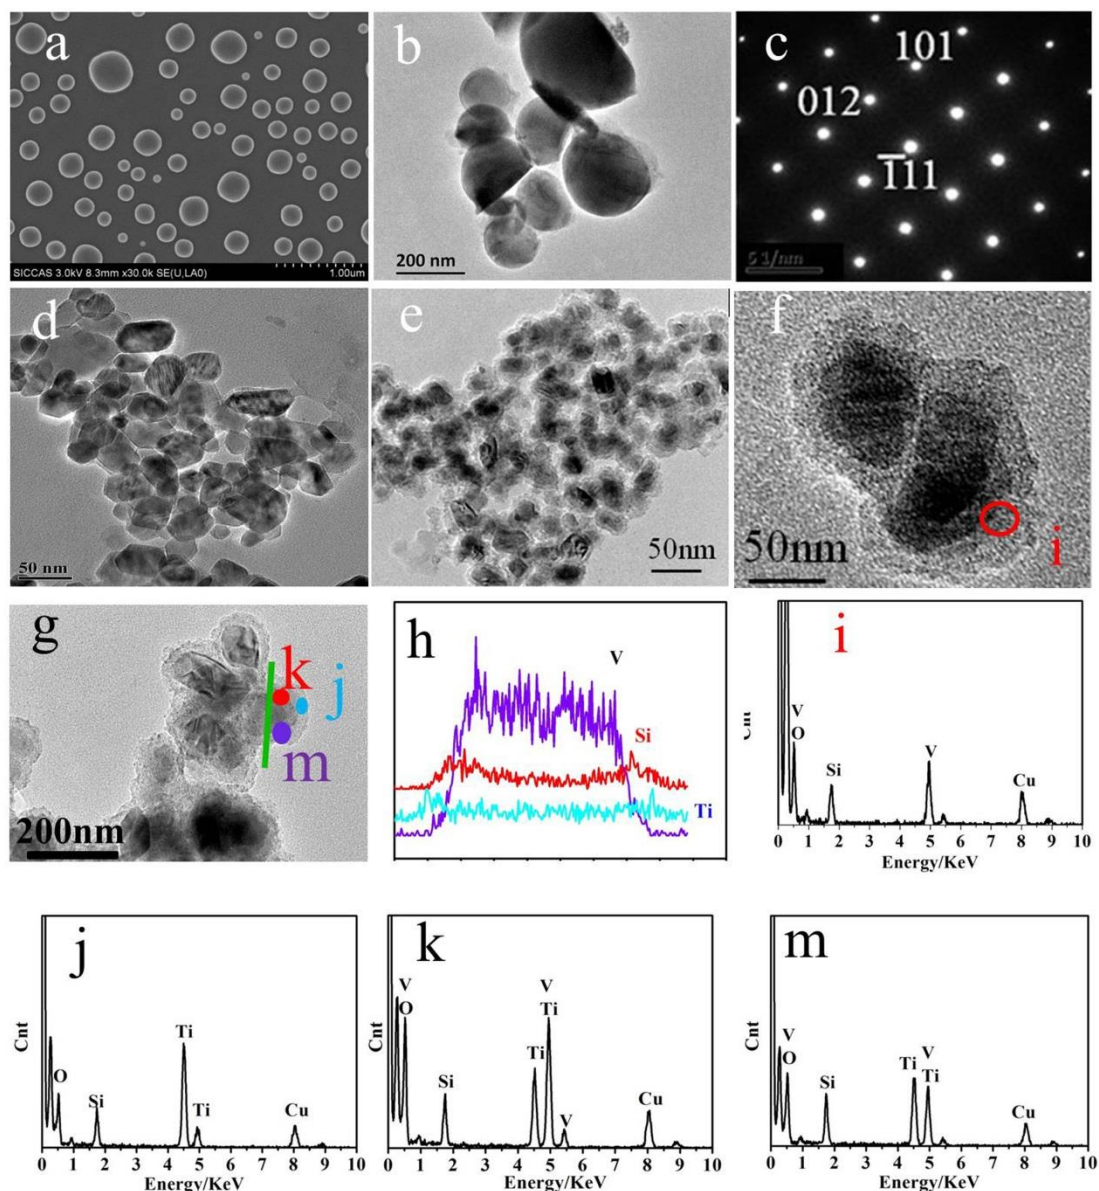

**Figure S2|SEM and TEM characterisation of the VO<sub>2</sub> film and the particles.** The SEM image of the VO<sub>2</sub> film is shown in a); the TEM image of the VO<sub>2</sub> film is shown in b); the SAED pattern of the film is shown in c); the TEM image of VO<sub>2</sub> particles is shown in d); the TEM image of VO<sub>2</sub>@SiO<sub>2</sub> is shown in e); the magnification of e) is shown in f); the corresponding EDS is shown in i); the TEM image of VO<sub>2</sub>@SiO<sub>2</sub>@TiO<sub>2</sub> is shown in j); the corresponding EDS of the points j), k) and m) are shown in g), k) and m), respectively; the result of the STEM of the green line in g) is shown in h).
